# Supplementary material for: Controlled synthesis of luminescent CIZS/ZnS/ZnS core/shell/shell nanoheterostructures
Source: Royal Society of Chemistry journal article supplement (doi:10.1039/d1ce00631b), 2021-01-01
Supplement: d1ce00631b1.pdf [file d1ce00631b1.pdf]

## Supporting Information

### Controlled synthesis of luminescent CIZS/ZnS/ZnS core/shell/shell nanoheterostructures

*Xue Bai<sup>a</sup>, Finn Purcell-Milton<sup>a</sup>, Yurii K. Gun'ko<sup>\*a</sup>*

a. School of Chemistry and CRANN institute, Trinity College Dublin, Dublin 2, Dublin,  
Ireland.

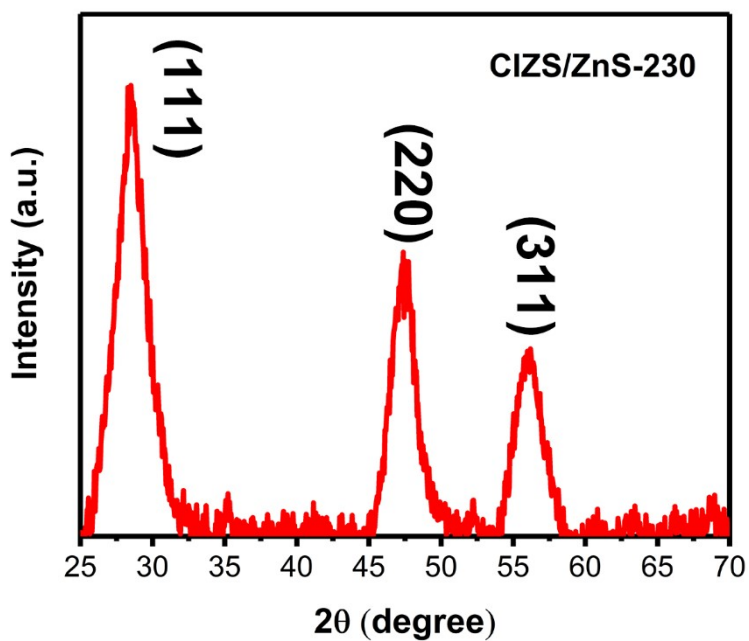

Figure S1. The X-ray powder diffraction pattern of CIZS/ZnS-230.

**Table S1.** Details of the PL lifetime of sample CIZS/ZnS-230 (CHISQ = 1.056, 3 exponential fitting).

| Components | $t_1$            | $t_2$            | $t_3$            |
|------------|------------------|------------------|------------------|
|            | 1.426485E-07 sec | 5.015957E-07 sec | 2.104727E-08 sec |
| Amplitude  | $B_1$            | $B_2$            | $B_3$            |
|            | 0.2029           | 0.7791           | 0.0181           |

**Table S2.** Details of the PL lifetime of sample CIZS/ZnS-260 (CHISQ = 1.094, 3 exponential fitting).

| Components | $t_1$            | $t_2$            | $t_3$            |
|------------|------------------|------------------|------------------|
|            | 9.760929E-08 sec | 5.032915E-07 sec | 8.587953E-09 sec |
| Amplitude  | $B_1$            | $B_2$            | $B_3$            |
|            | 0.1445           | 0.8430           | 0.0126           |

**Table S3.** Details of the PL lifetime of sample CIZS/ZnS-280 (CHISQ = 1.084, 3 exponential fitting).

| Components | $t_1$            | $t_2$            | $t_3$            |
|------------|------------------|------------------|------------------|
|            | 1.007718E-07 sec | 6.081183E-07 sec | 1.327636E-08 sec |
| Amplitude  | $B_1$            | $B_2$            | $B_3$            |
|            | 0.1341           | 0.8424           | 0.0235           |

**Table S4.** Details of the PL lifetime of sample CIZS/ZnS-280/ZnS-2 h (CHISQ = 1.072, 3 exponential fitting).

| Components | $t_1$            | $t_2$            | $t_3$           |
|------------|------------------|------------------|-----------------|
|            | 1.023656E-07 sec | 6.595245E-07 sec | 1.25553E-08 sec |
| Amplitude  | $B_1$            | $B_2$            | $B_3$           |
|            | 0.1156           | 0.8705           | 0.0139          |

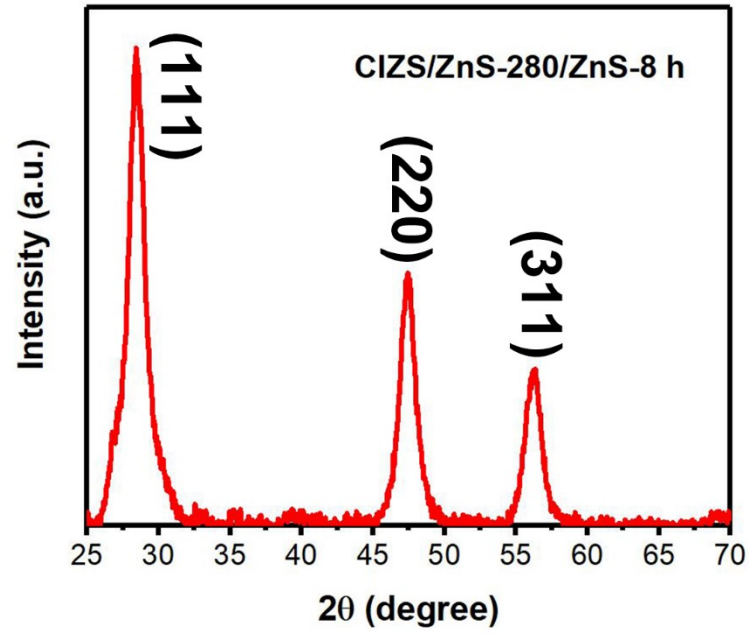

**Figure S2.** The X-ray powder diffraction pattern of CIZS/ZnS-280/ZnS-8 h.

**Table S5.** Details of the PL lifetime of sample CIZS/ZnS-280/ZnS-4 h (CHISQ = 1.042, 3 exponential fitting).

| Components | $t_1$            | $t_2$            | $t_3$           |
|------------|------------------|------------------|-----------------|
|            | 8.342819E-08 sec | 6.770391E-07 sec | 6.04293E-09 sec |
| Amplitude  | B1               | B2               | B3              |
|            | 0.0839           | 0.9085           | 0.076           |

**Table S6.** Details of the PL lifetime of sample CIZS/ZnS-280/ZnS-8 h (CHISQ = 1.7096, 3 exponential fitting).

| Components | $t_1$            | $t_2$            | $t_3$            |
|------------|------------------|------------------|------------------|
|            | 8.057041E-08 sec | 6.622875E-07 sec | 5.033062E-09 sec |
| Amplitude  | $B_1$            | $B_2$            | $B_3$            |
|            | 0.0848           | 0.9082           | 0.007            |

**Table S7.** Details of the PL lifetime of sample CIZS/ZnS-230/ZnS-8 h (CHISQ = 1.072, 3 exponential fitting).

| Components | $t_1$            | $t_2$            |
|------------|------------------|------------------|
|            | 8.850976E-08 sec | 4.710311E-07 sec |
| Amplitude  | $B_1$            | $B_2$            |
|            | 0.1165           | 0.8835           |

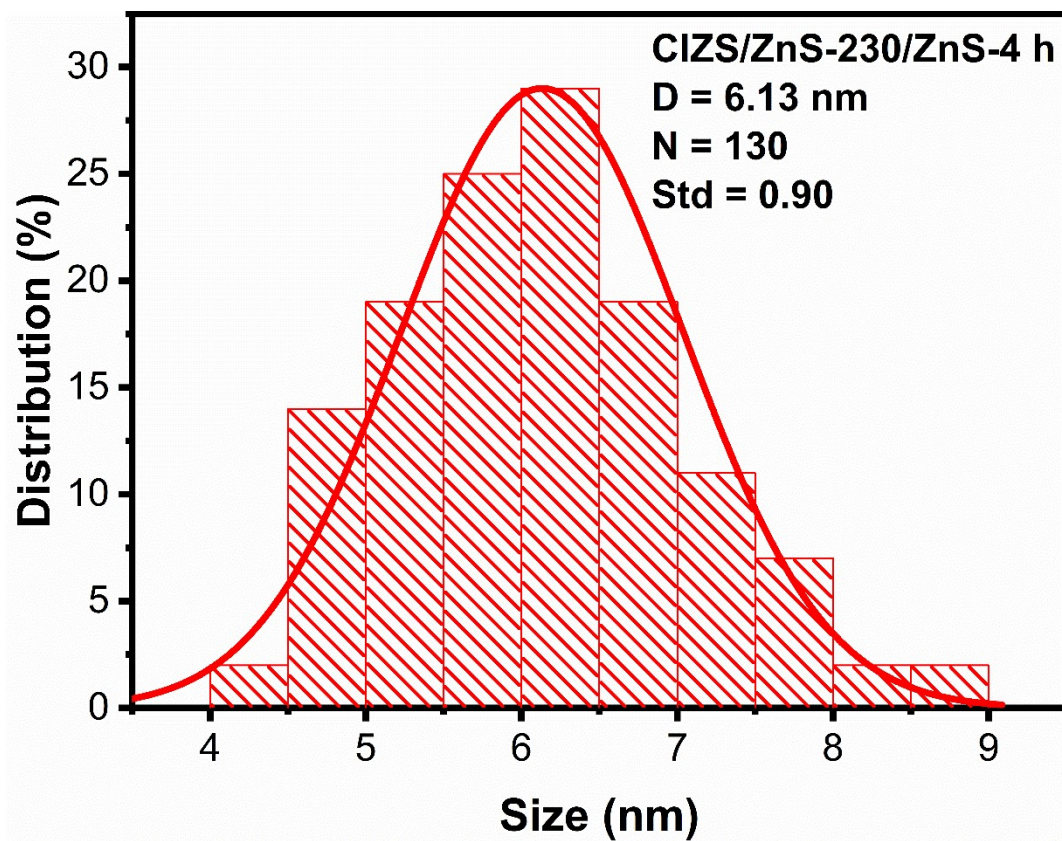

**Figure S3.** The size distribution histogram of CIZS/ZnS-230/ZnS-4 h.
